# Supplementary material for: Enhancer of Zeste Homologue 2 (EZH2) Down-regulates RUNX3 by Increasing Histone H3 Methylation
Source: PubMed Central journal article supplement — J Biol Chem. 2008 Jun 20;283(25):17324–32. doi: 10.1074/jbc.M800224200 (PMC2427338; doi:10.1074/jbc.m800224200), 2008-06-20

**SUPPLEMENTAL FIGURE 1. Chromatin immunoprecipitation (ChIP) assay in MKN28 and MCF-7 cells.** *A*, ChIP primer set 1/MKN28 cells, *B*, ChIP primer set 1/MCF-7 cells, *C*, ChIP primer set 2/MKN28 cells, *D*, ChIP primer set 2/MCF-7 cells, *E*, ChIP primer for MYT1 gene/MKN28 cells. Individual ChIP assays were repeated at least three times to confirm the reproducibility of the PCR based experiment. The results of ChIP assays were shown as diagrams for each antibody and statistical analyses with student's *t* test. H3K27me<sub>3</sub>; H3-Lys-27 trimethylation, HDAC1; histone deacetylase 1, H3K9me<sub>2</sub>; H3-Lys-9 dimethylation. \*indicates  $P < 0.05$  and all data represent means + s.d. with at least three experiments.

**SUPPLEMENTAL FIGURE 1.****A *ChIP primer 1 (MKN28)***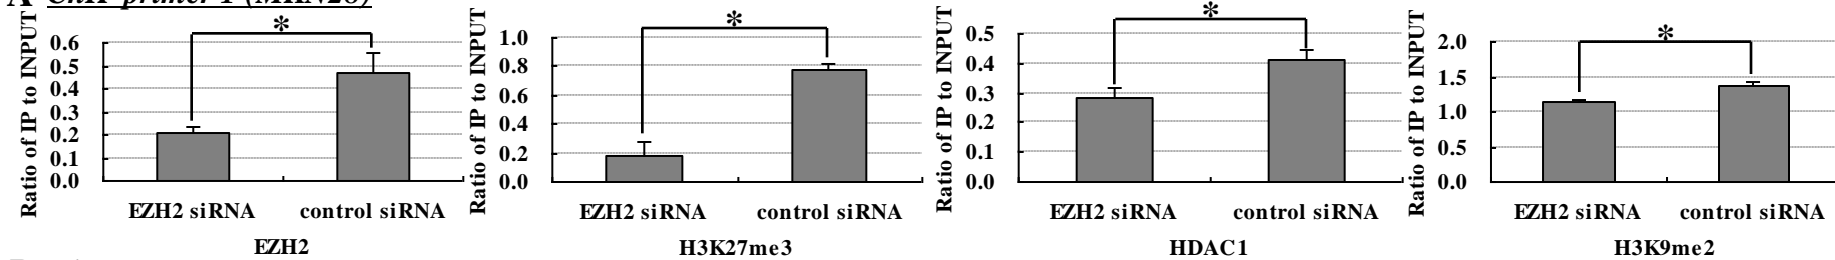**B *ChIP primer 1 (MCF-7)***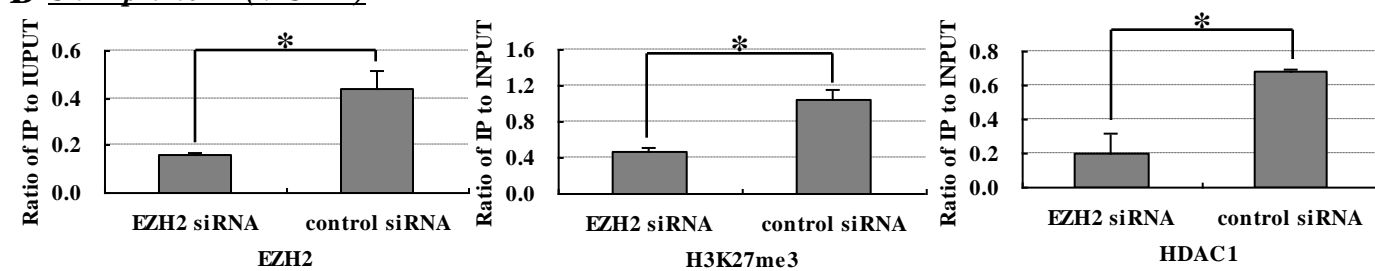**C *ChIP primer 2 (MKN28)***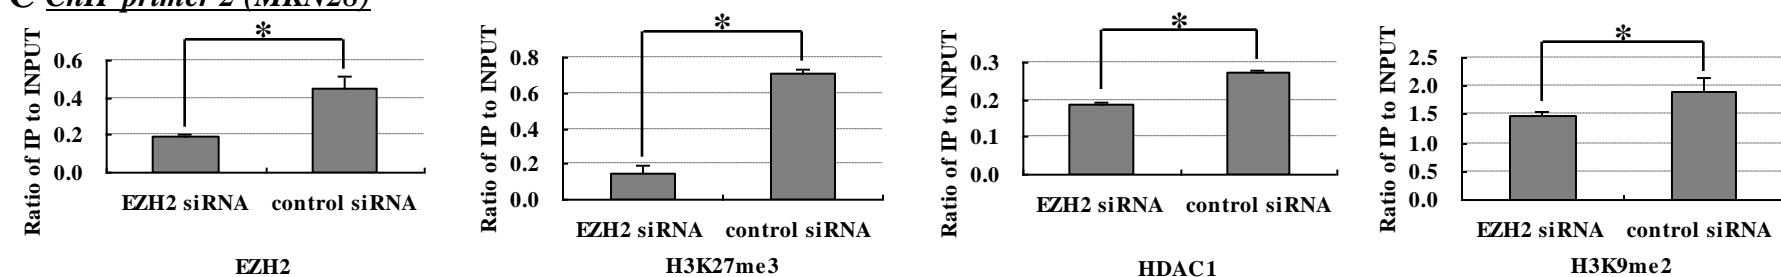**D *ChIP primer 2 (MCF-7)***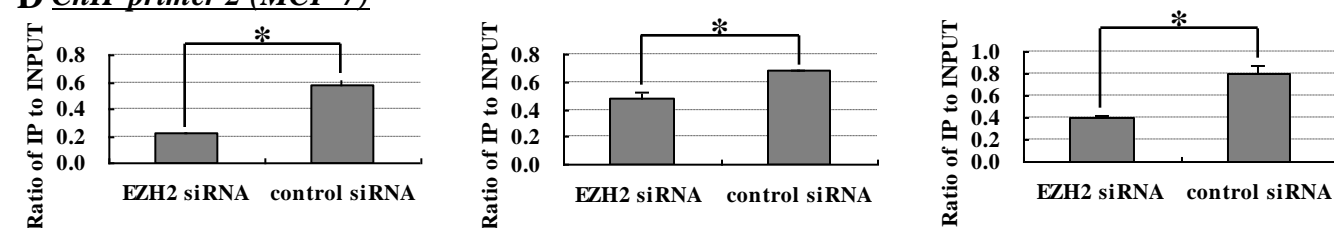**E *MYT1 gene (MKN28)***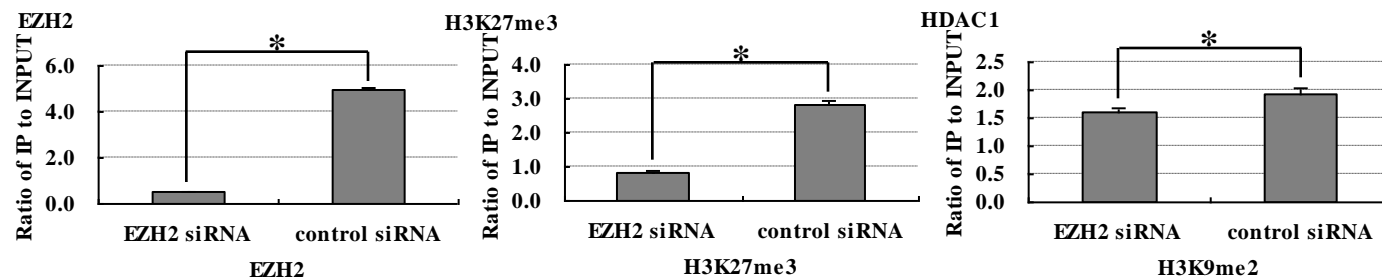

Supplement: M800224200v2_1.pdf [file M800224200v2_1.pdf]
